# Supplementary material for: Copper(i) catalyzed Sonogashira reactions promoted by monobenzyl nicotinium chloride, a N-donor quaternary ammonium salt
Source: Royal Society of Chemistry journal article supplement (doi:10.1039/c5ra19028b), 2015-01-01

# Supporting Information

## **Copper(I) catalyzed Sonogashira reactions promoted by monobenzyl nicotinium chloride a *N*- donor quaternary ammonium salt**

Abdol Reza Hajipour, <sup>ab\*</sup> Elahe Boostani, <sup>b</sup> Fatemeh Mohammadsaleh<sup>b</sup>

<sup>a</sup> Department of Pharmacology, University of Wisconsin, Medical School, 1300

University Avenue, Madison, 53706-1532, WI, USA

<sup>b</sup> Pharmaceutical Research Laboratory, College of Chemistry, Isfahan University

of Technology, Isfahan 84156, Iran

Fax +98(313)3912350

E-mail: haji@cc.iut.ac.ir, arhajipour@wisc.edu

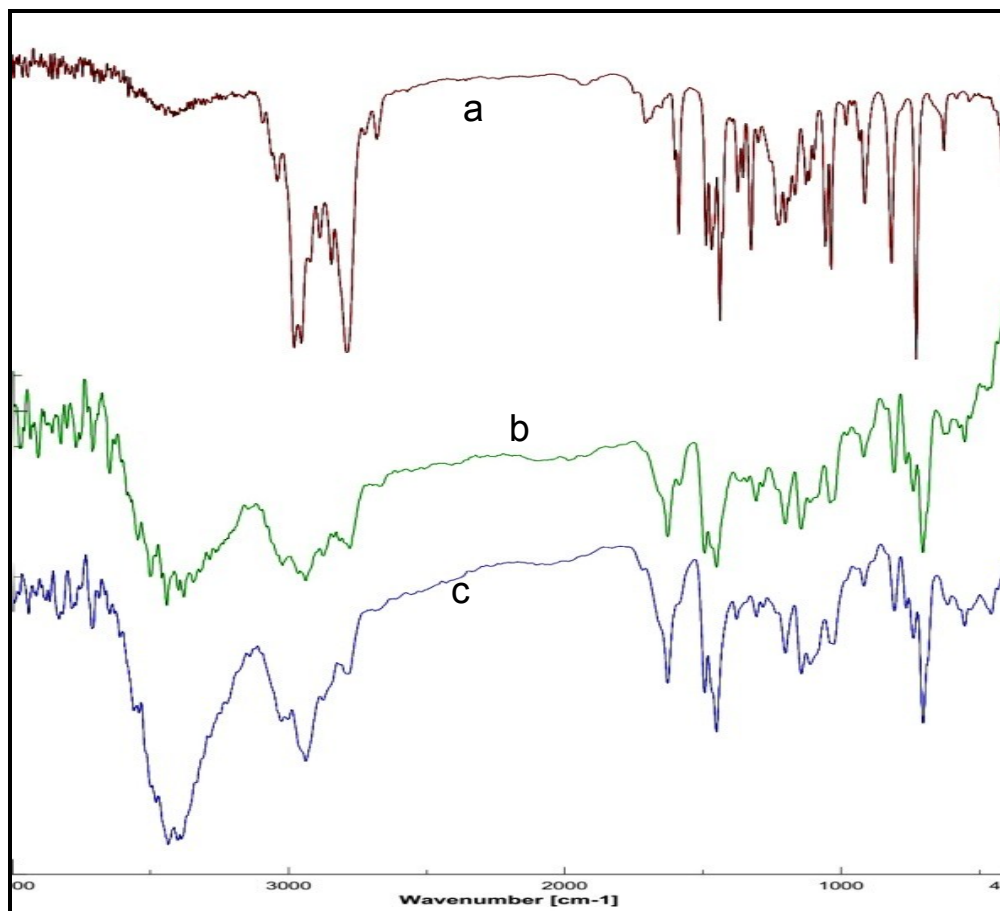

**Figure 1** FT-IR spectra, a)Nicotine, b)[MBNT]Cl, c)[MBNT][Cu<sub>4</sub>Cl<sub>5</sub>]

**Nicotine:** FT-IR (KBr, cm<sup>-1</sup>):  $\nu = 3025, 2970, 2870, 1691, 1677, 904, 717$ .

**[MBNT]Cl:** FT-IR (KBr, cm<sup>-1</sup>):  $\nu = 3412, 3043, 2958, 1632, 1610, 1451, 1197, 916, 703, 472$ .

**[DBNT][Cu<sub>4</sub>Cl<sub>5</sub>]:** FT-IR (KBr, cm<sup>-1</sup>):  $\nu = 3401, 3040, 2945, 1635, 1611, 1455, 1213, 918, 704, 475$ .

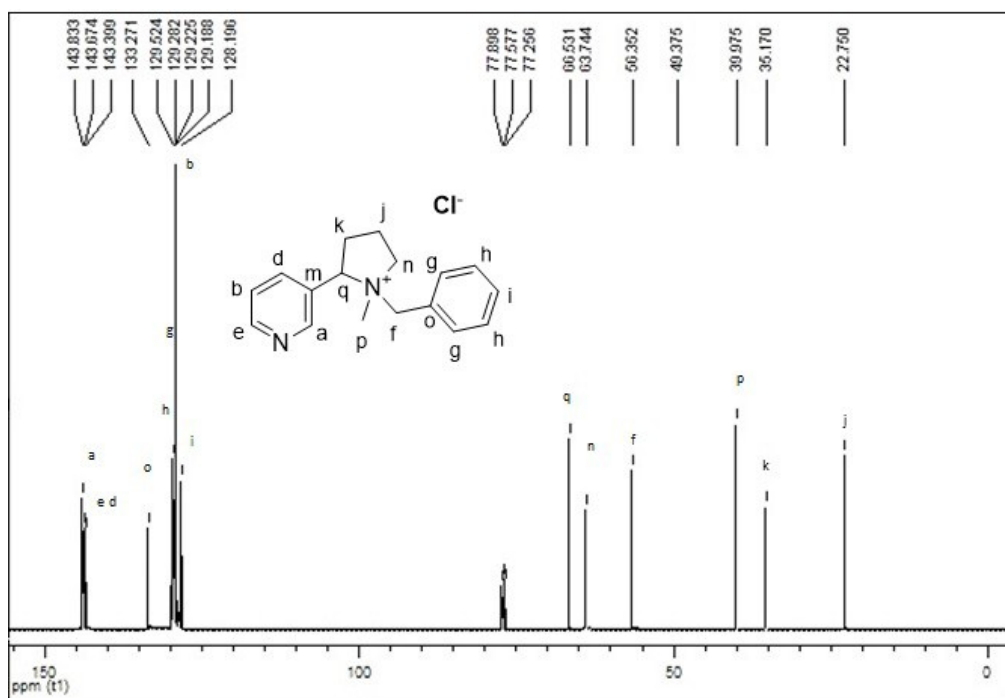

**Figure 2.**  $^{13}\text{C}$ -NMR ( $\text{CDCl}_3$ , 100 MHz) spectrum of monobenzyl nicotinium chloride

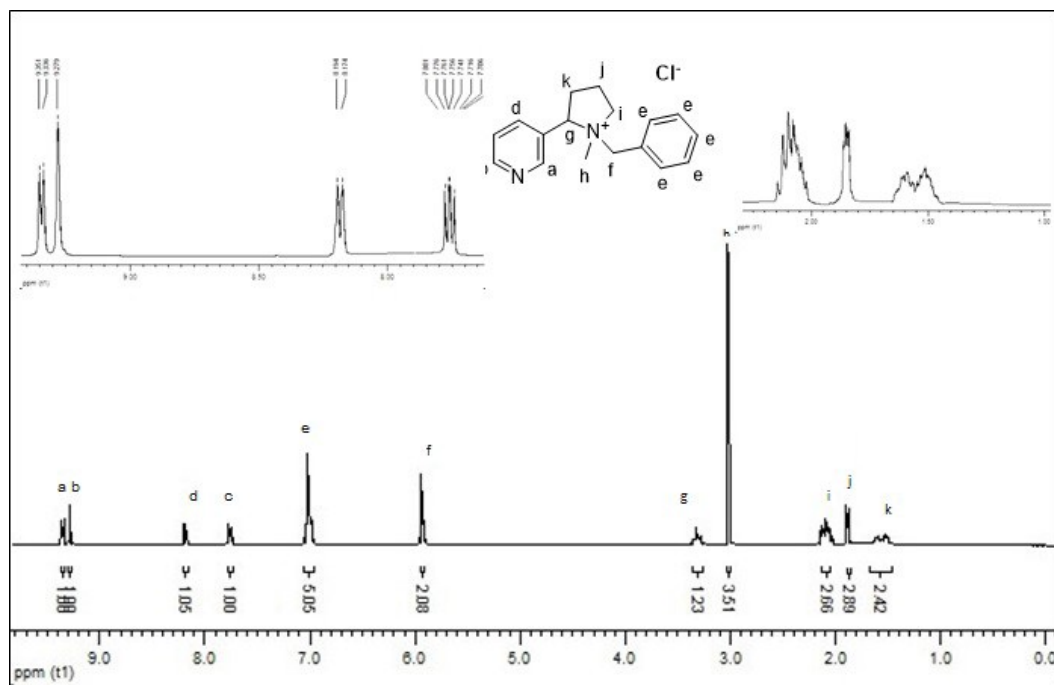

**Figure 3.**  $^1\text{H}$ -NMR ( $\text{CDCl}_3$ , 400 MHz) spectrum of monobenzyl nicotinium chloride

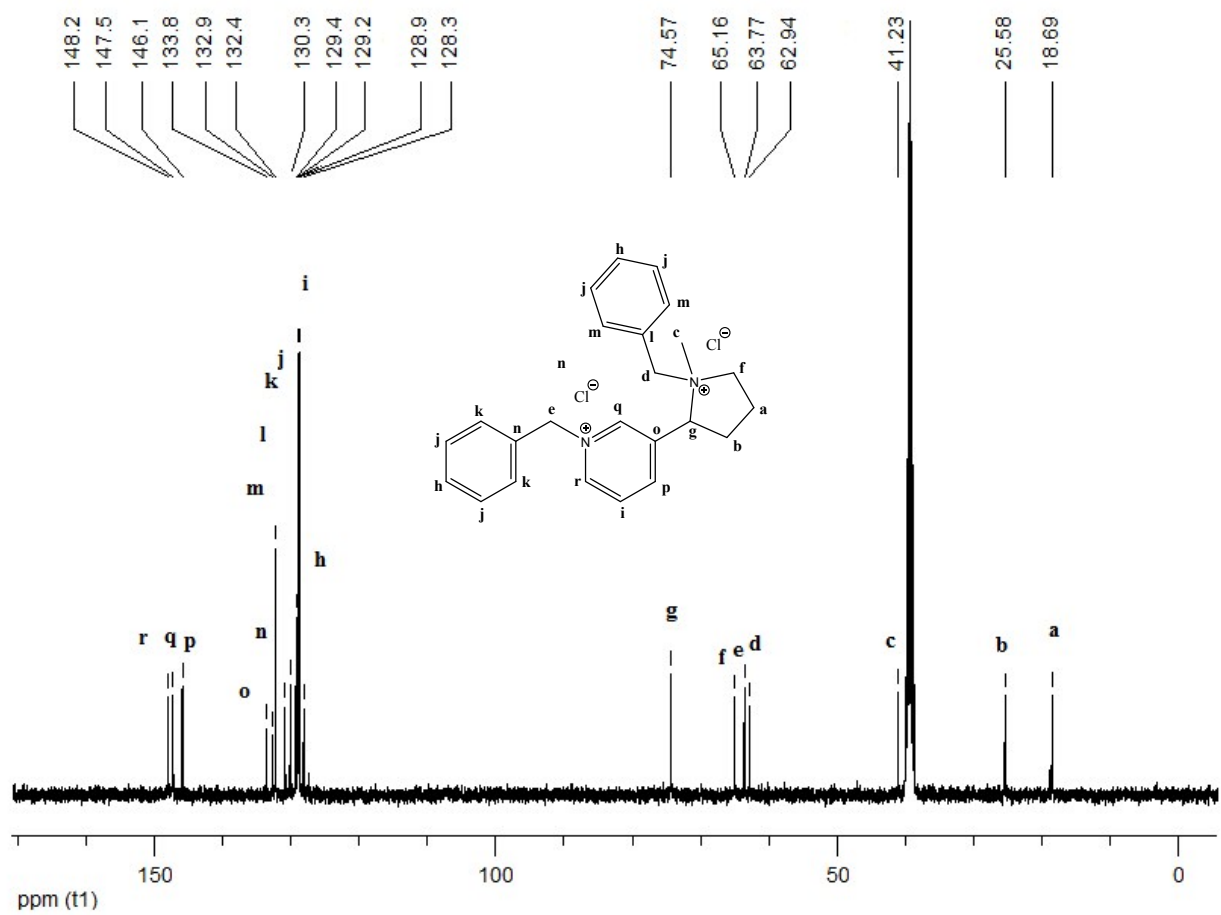

**Figure 4**  $^{13}\text{C}$ -NMR ( $\text{CDCl}_3$ , 100 MHz) spectrum of dibenzyl nicotinium chloride

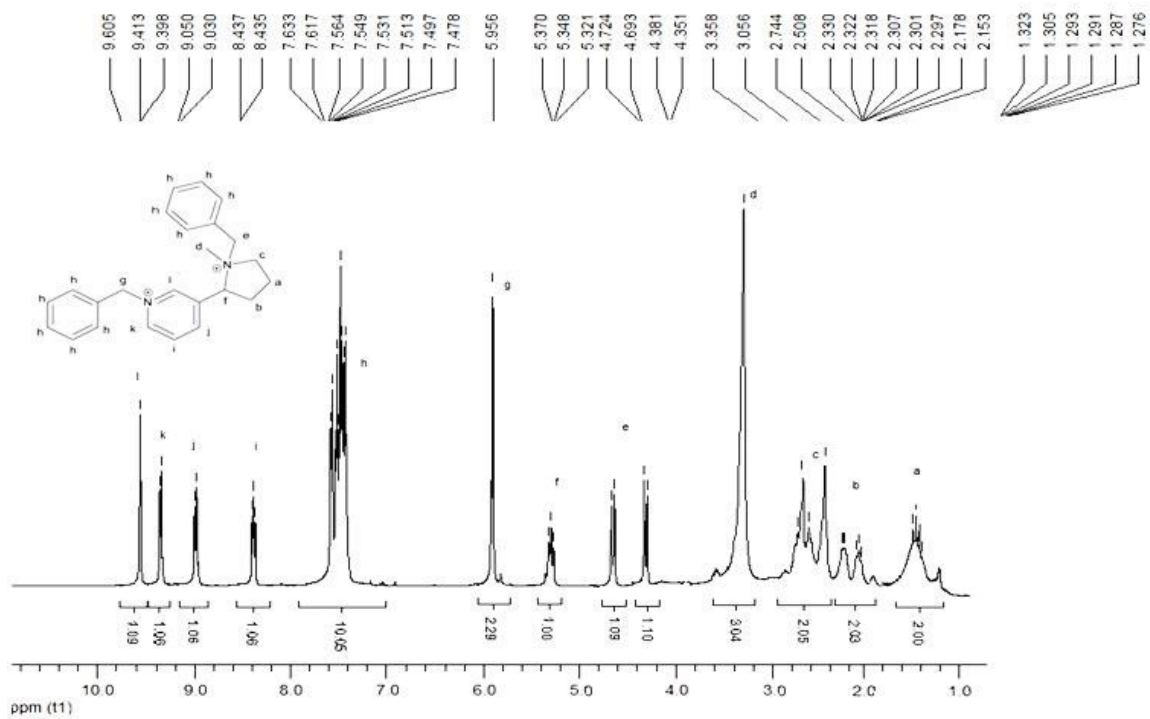

**Figure 5** <sup>1</sup>H-NMR (CDCl<sub>3</sub>, 400 MHz) spectrum of dibenzyl nicotinium chlorid

## NMR, Mass and FTIR spectra

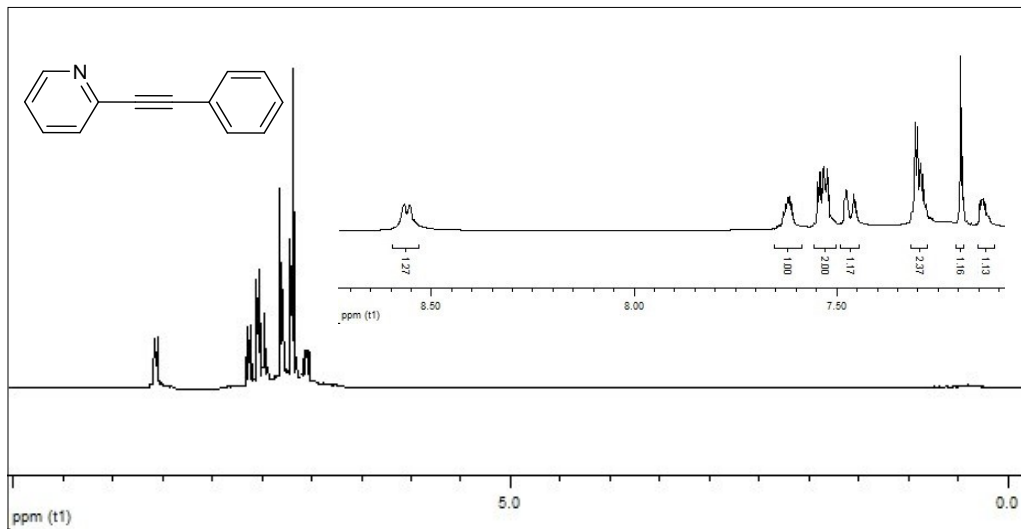

<sup>1</sup>H-NMR (CDCl<sub>3</sub>, 400 MHz)

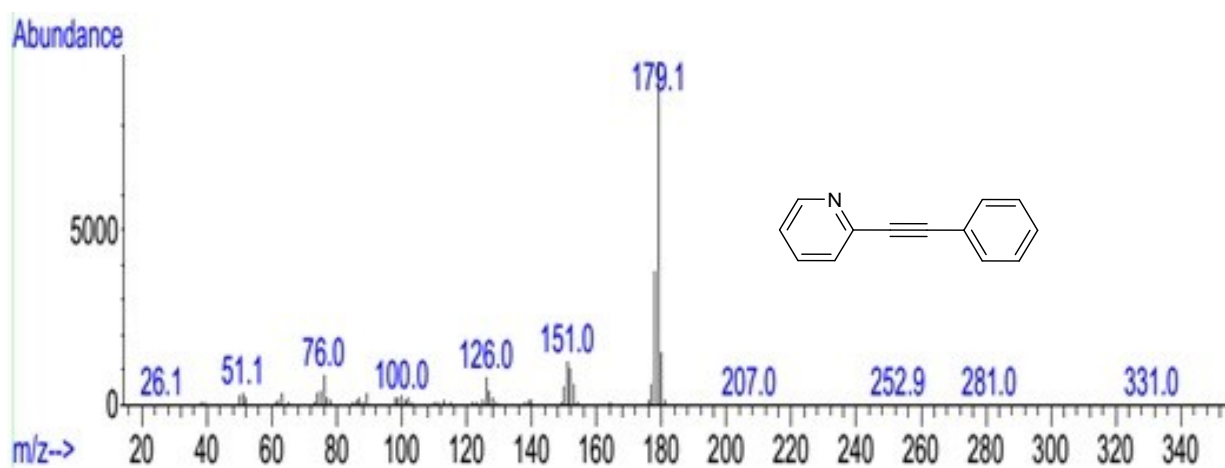

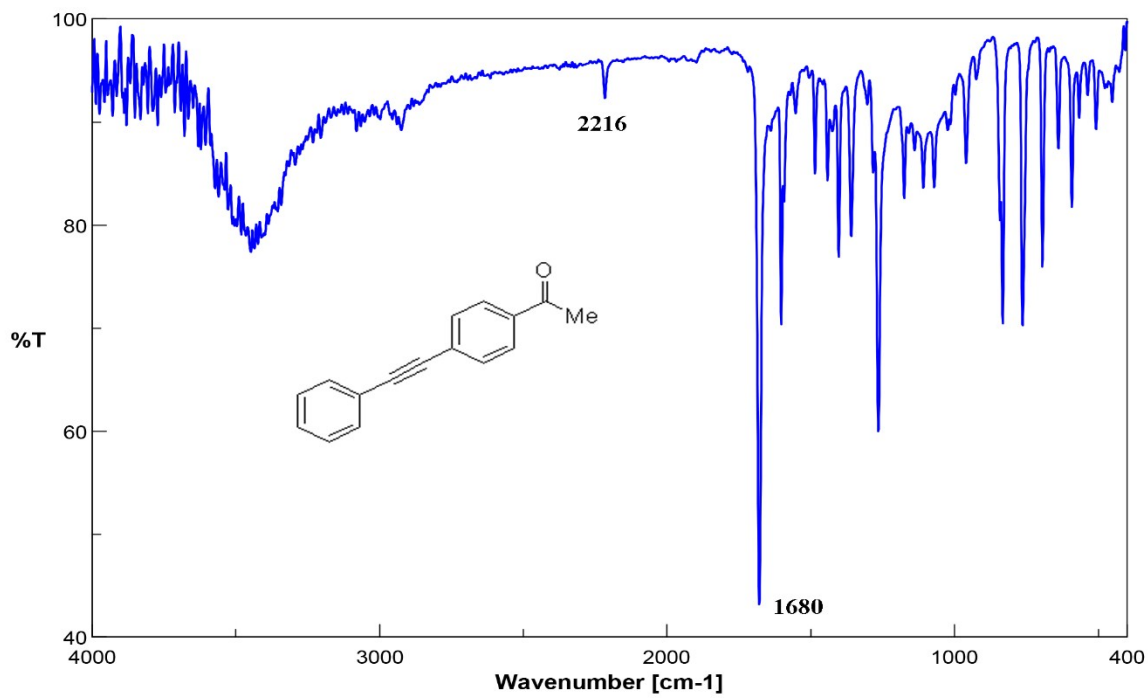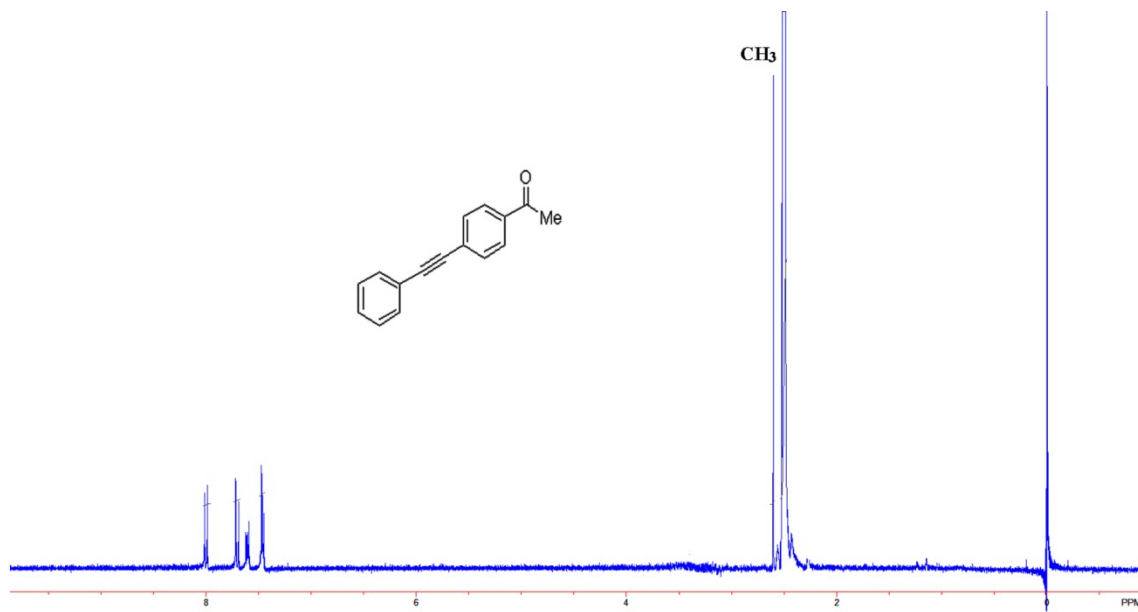

<sup>1</sup>H-NMR (DMSO, 300 MHz)

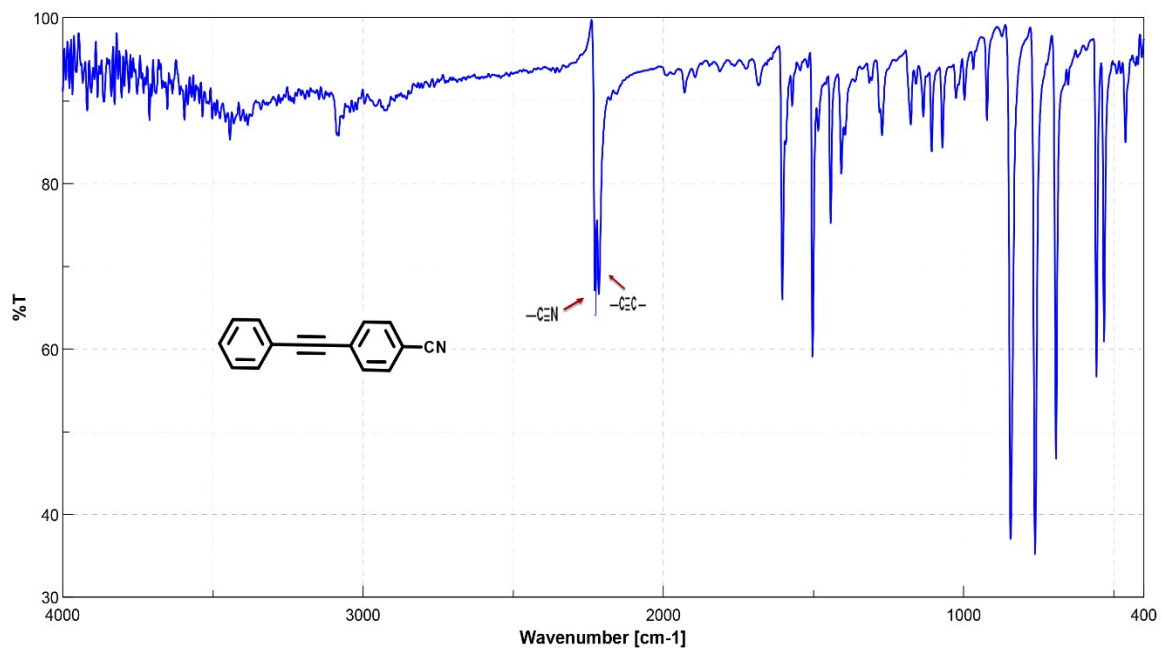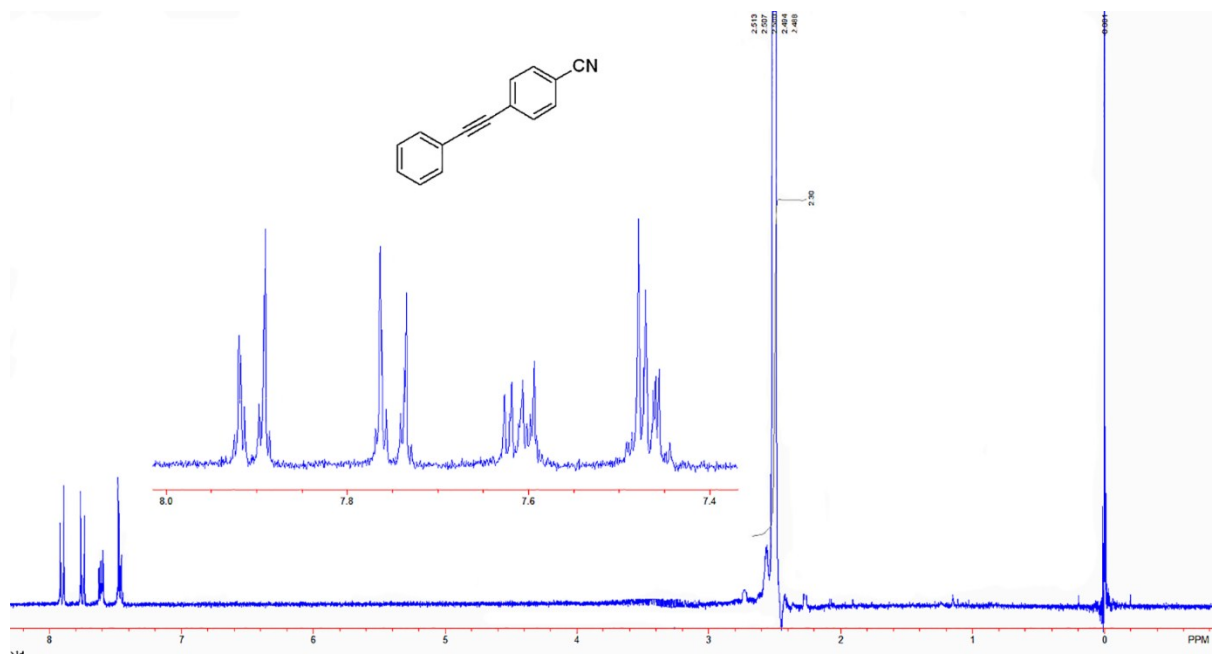

<sup>1</sup>H-NMR (DMSO, 300 MHz)



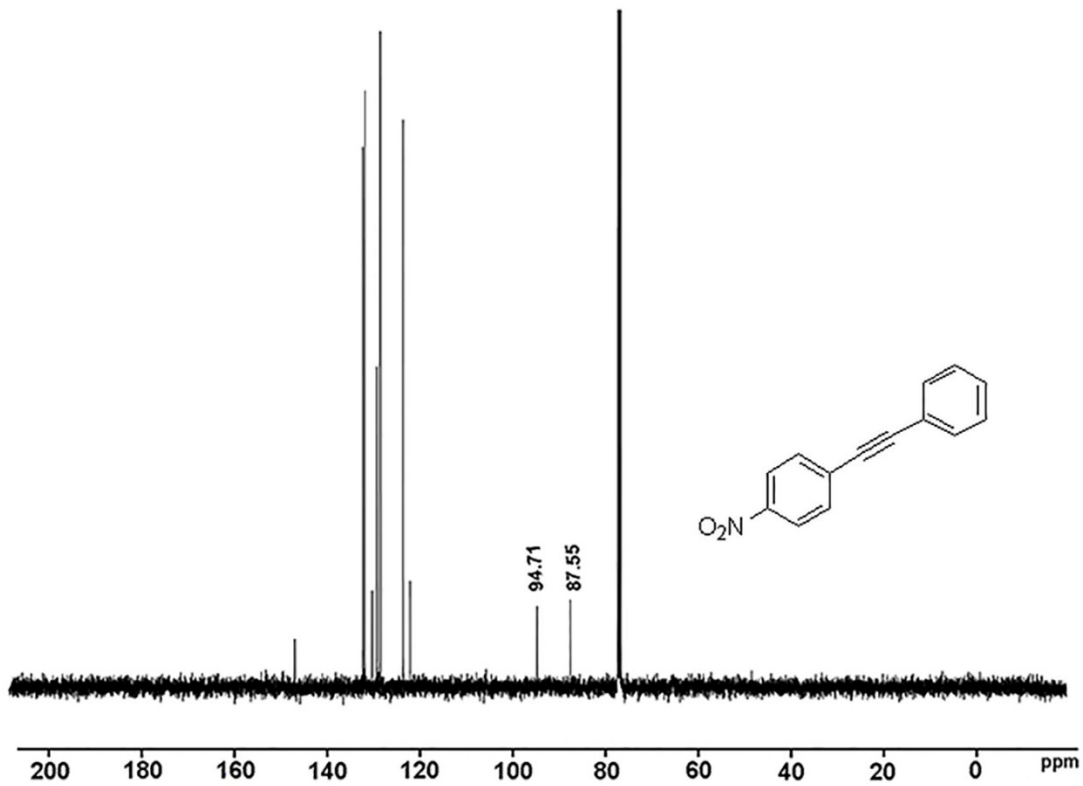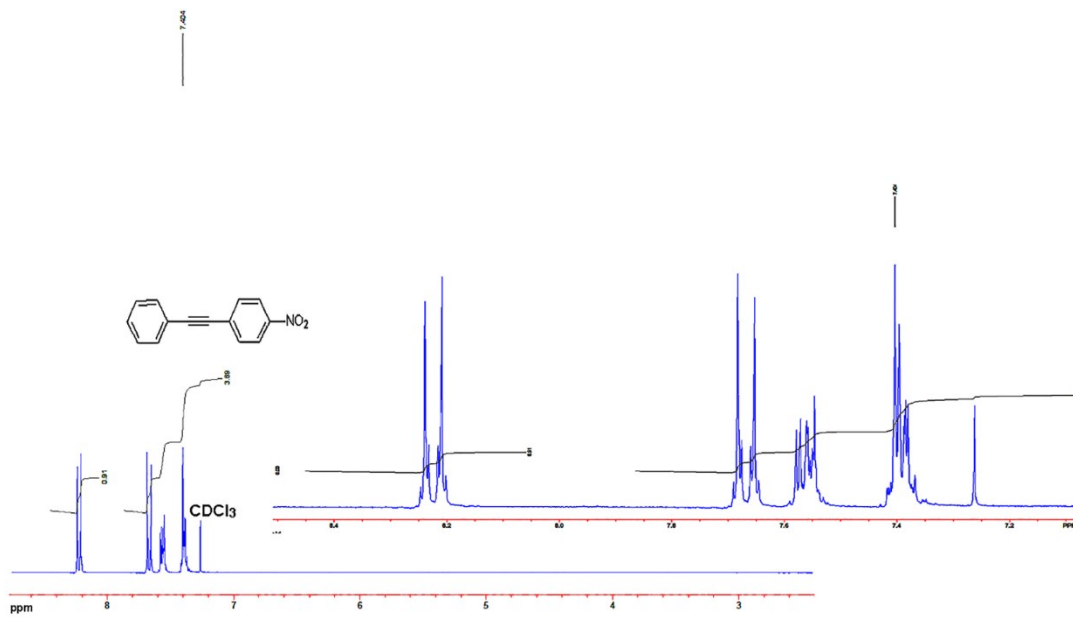

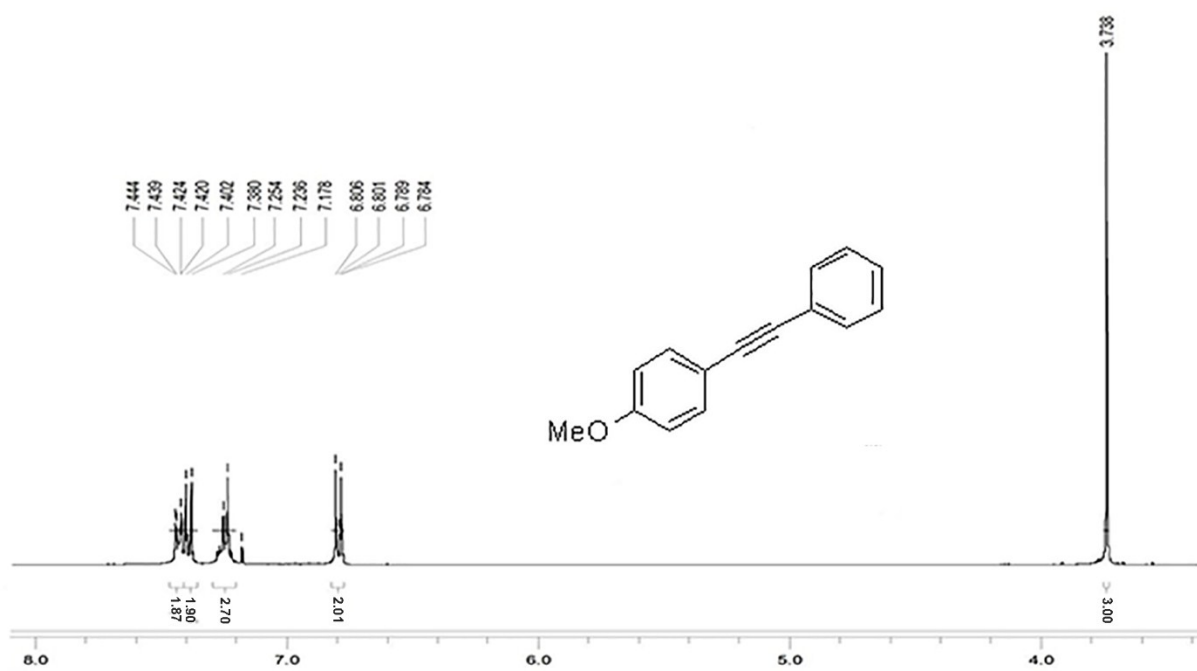

<sup>1</sup>H-NMR (CDCl<sub>3</sub>, 400 MHz)

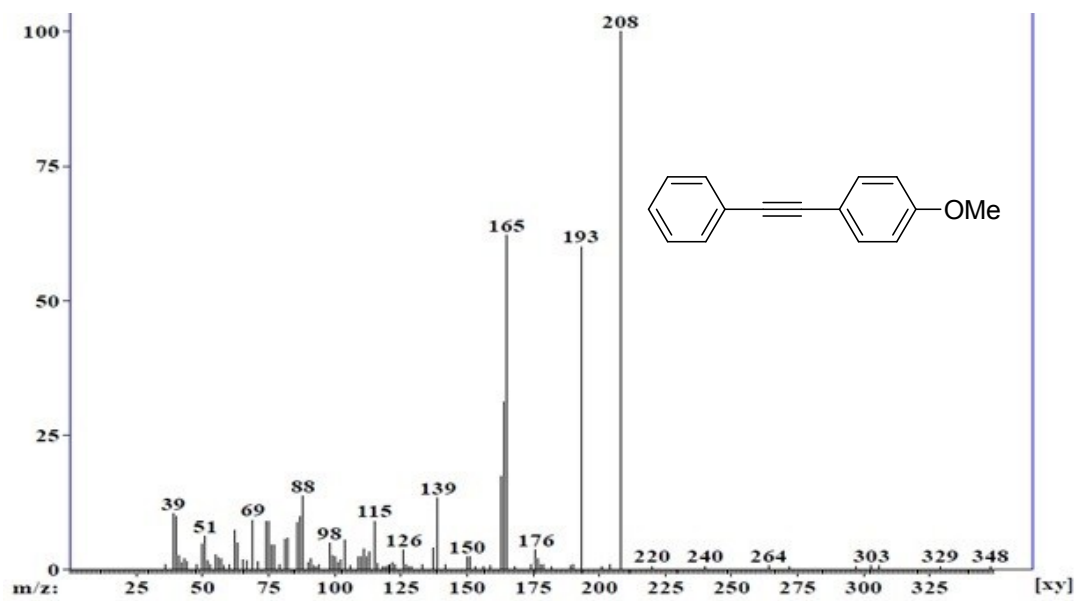

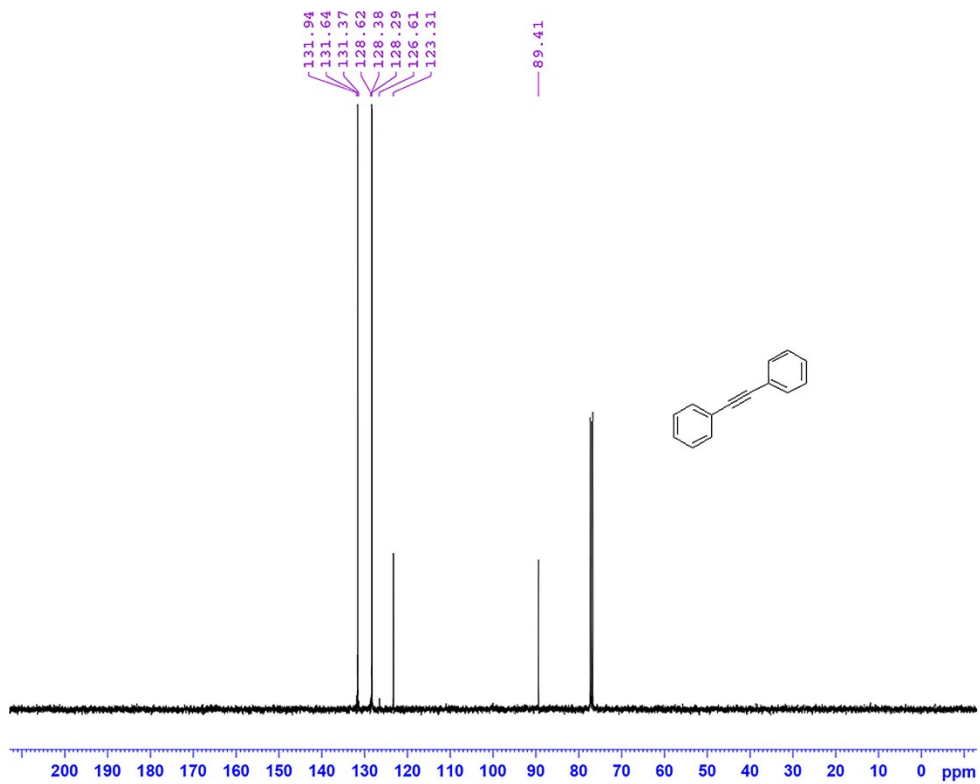

Supplement: c5ra19028b1.pdf [file c5ra19028b1.pdf]
